# Supplementary material for: ASSERT (Acute Sacral inSufficiEncy fractuRe augmenTation) randomised controlled, feasibility in older people trial: a study protocol
Source: PubMed Central journal article supplement (PMC6624053; doi:10.1136/bmjopen-2019-032111), 2019-07-10
Supplement: bmjopen-2019-032111.reviewer_comments.pdf [file bmjopen-2019-032111.reviewer_comments.pdf]

## PEER REVIEW HISTORY

BMJ Open publishes all reviews undertaken for accepted manuscripts. Reviewers are asked to complete a checklist review form (<http://bmjopen.bmj.com/site/about/resources/checklist.pdf>) and are provided with free text boxes to elaborate on their assessment. These free text comments are reproduced below.

## ARTICLE DETAILS

|                            |                                                                                                                                                                                                           |
|----------------------------|-----------------------------------------------------------------------------------------------------------------------------------------------------------------------------------------------------------|
| <b>TITLE (PROVISIONAL)</b> | The ASSERT (Acute Sacral insufficiency fracture augmentation) Randomised Controlled, Feasibility in Older People Trial: study protocol.                                                                   |
| <b>AUTHORS</b>             | van Berkel, Dawn; Ong, Terence; Drummond, Avril; Hendrick, Paul; Leighton, Paul; Jones, Matthew; Salem, Khalid; Quraishi, Nasir; Brookes, Cassandra; Suazo Di Paola, Ana; Edwards, Sarah; Sahota, Opinder |

This article was not externally reviewed at BMJ Open. Protocols that have been independently assessed prior to submission to BMJ Open are usually fast-tracked to publication on the grounds that further substantial changes will not be possible. This independent assessment will usually be external, independent review for both a substantial grant award from a non-commercial or government funder and ethics approval.
